# Supplementary material for: An automated and objective cover test to measure heterophoria
Source: PLoS One. 2018 Nov 1;13(11):e0206674. doi: 10.1371/journal.pone.0206674 (PMC6211723; doi:10.1371/journal.pone.0206674)
Supplement: S1 Dataset — (XLSX) [file pone.0206674.s003.xlsx]

## Sheet: Sheet1
SESSION 1																																				SESSION 2
ID participant	Age	Cover Test (PD)		Thorington horitzontal (PD)		Domit eye				Partial measures 2-eyes (PD)						Phoria 2-eyes (PD)		Partial measures 1-eye (PD)						Phoria 1-eye (PD)		Phoria RE 2-eyes (PD)		Phoria RE 1-eye (PD)		Phoria LE 2-eyes (PD)		Phoria LE 1-eye (PD)		RE tracking accuracy (º)	LE tracking accuracy (º)	Partial measures 2-eyes (PD)						Phoria 2-eyes (PD)		Partial measures 1-eye (PD)
						1	2	3	collapsed	1	2	3	4	5	6			1	2	3	4	5	6													1	2	3	4	5	6			1	2	3	4	5	6
1	21	6	e	5	e	LE	RE	LE	LE	3.00635	3.19697	2.98556	3.55593	2.81576	1.95656	2.99596	e	3.57482	3.40495	3.98398	3.24897	3.53322	1.61366	3.46908	e	3.19697	e	3.24897	e	2.98556	e	3.57482	e	0.36	0.19	2.89872	2.594	2.28565	1.94964	2.35616	1.05264	2.32091	e	2.09399	2.61132	3.0826	1.69332	3.15661	0.841407
2	24	-5	x	-2	x	RE	RE	RE	RE	-6.0251	-3.55055	-4.79577	-3.03408		-3.80365	-3.80365	x	-7.03351	-3.82793	-5.06303	-4.62574		-4.2441	-4.62574	x	-3.55055	x	-4.2441	x	-5.41044	x	-6.04827	x	0.29	0.42	-4.41062	-2.82269	-5.54915	-2.70141	-6.55696	-1.22579	-3.61665	x	-5.22967	-3.86954	-5.97992	-3.39109	-6.61956	-3.08953
3	29	2	e	4	e	RE	RE	RE	RE	0.70636	3.14498	0.0276996	2.3584	0.495141	1.20847	0.957416	o	0.467441	2.52123	0.100411	1.96003	0.581704	0.834481	0.708092	o	2.3584	e	1.96003	e	0.495141	e	0.467441	e	0.2	0.36		1.69679	0.315088	1.77645	-0.740994		1.00594	e		0.91759	0.588632	1.61366	-0.612873
4	24	-14	x	-10	x	RE	RE	RE	RE	-8.92219	-11.0134	-7.32586	-7.90048	-8.65352	-7.84474	-8.277	x	-9.11766	-11.0975	-6.62651	-7.99456	-7.97366	-8.90823	-8.45139	x	-7.90048	x	-8.90823	x	-8.65352	x	-7.97366	x	0.26	0.42	-7.5661	-7.55218	-9.03388	-7.79597	-10.439	-6.81433	-7.68103	x	-7.58351	-7.92488	-9.11417	-7.85519	-9.75345	-8.07472
5	25	1	e	1	e	RE	RE	RE	RE	-1.98427			1.10987	-3.13459	1.48552	-0.437201	o	-1.67254			1.13228	-2.11937	1.00762	-0.33246	o	1.29769	e	1.06995	e	-2.55943	x	-1.89595	x	0.69	0.73	-2.76724		-1.77645		-0.633643	-0.921052	-1.34875	x	-2.4554		-1.14267		-0.595555	-0.65442
6	24	12	e	11	e	LE	LE	LE	LE	7.63923	7.97017	5.58674	4.69048	4.09013	6.40049	5.99362	e	7.76462	7.37808	5.62556	3.74818	4.12481	5.88958	5.75757	e	6.40049	e	5.88958	e	5.58674	e	5.62556	e	0.33	0.24	8.0782	7.09615	6.04595	3.64763	5.62642	5.53872	5.83618	e	8.29431	6.24058	6.0112	3.57482	5.4276	5.03873
7	22	-8	x	-2	x	RE	RE	RE	RE	-3.56803	-3.00636	-3.39871	-2.85041	-3.50895	-2.61478	-3.20253	x	-2.84559	-3.2559	-3.18658	-3.23857	-3.55749	-3.12419	-3.21257	x	-2.85041	x	-3.23857	x	-3.50895	x	-3.18658	x	0.18	0.17	-2.67054	-2.5191	-4.27533	-1.41626	-7.6462	-1.54093	-2.59482	x	-2.67022	-2.7118	-4.14352	-1.69332	-6.47698	-1.65869
8	35	0	o	-1	x	LE	RE	RE	RE	-1.60673	-1.05264	-0.145426		-0.581704		-0.817172	o	-1.43011	-0.803315	-0.301239		-0.51938		-0.661348	o	-1.05264	x	-0.803315	x	-0.581704	x	-0.51938	x	0.29	0.22	-0.495141	-0.58517	-1.42664	-0.432815	-2.18865	-1.68293	-1.00591	x	-1.05264	-0.765226	-1.81108	-0.955678	-2.38265	-2.16786
9	37	2	e	0.5	o	LE	LE	LE	LE	2.24408	2.79496	3.95623	2.02238	1.82148	1.43357	2.13323	e	1.43704	2.36533	3.45002	1.66908	1.46128	1.3089	1.56518	e	2.02238	e	1.66908	e	2.24408	e	1.46128	e	0.27	0.24	3.29056	2.60439	1.25349	1.73142		0.602485	1.73142	e	2.50044	1.58596	0.893346	1.35738		0.633648
10	29	14	e	12	e	RE	RE	RE	RE	8.1156	8.49656	7.08919	5.6985	8.4303	4.46612	7.60239	e	8.53497	7.56262	6.59521	5.91738	8.20019	4.96236	7.07892	e	5.6985	e	5.91738	e	8.1156	e	8.20019	e	0.33	0.53	3.87689	3.47082	5.56998	2.69794	4.80618	5.41717	4.34154	e	4.08802	3.92849	5.02832	2.91971	4.77148	5.4901
11	27	-2	x	0	o	LE	RE	LE	LE	0.439741	-1.00873	-0.557472	-0.0553992		-0.242375	-0.242375	o	0.349715	-0.630182	-0.356641	-0.502067		-0.304703	-0.356641	o	-0.242375	x	-0.502067	x	-0.0588654	x	-0.00346275	x	0.18	0.21	-0.885954	-0.128115		-0.779078	1.01109		-0.453597	o	-0.719744	-0.238914		-0.39819	0.713288
12	28	-6	x	-4	x	LE	LE	LE	LE	-3.41882	-2.16094	-2.59053	-1.80069	-3.04448	-2.83308	-2.71181	x	-2.97863	-2.29257	-2.58707	-2.47273	-2.69794	-3.08953	-2.6425	x	-2.16094	x	-2.47273	x	-3.04448	x	-2.69794	x	0.22	0.3	-1.98774	-0.39819	-1.54786	-1.81455	-2.72566	-0.11426	-1.68121	x	-2.00852	-0.896812	-1.71757	-2.27872	-2.48659	-0.647495
13	26	-6	x	-4	x	RE	RE	RE	RE	-1.25003	-4.60491	-1.43703	-4.04987	-1.67254	-2.09694	-1.88474	x	-1.91846	-4.31002	-2.11937	-3.80019	-2.23022	-2.46263	-2.34643	x	-4.04987	x	-3.80019	x	-1.43703	x	-2.11937	x	0.37	0.27	-3.83962	-2.89339	-4.06028	-4.72293	-2.40344	-5.1939	-3.94995	x	-3.63987	-2.50703	-3.10686	-3.69617	-2.00852	-3.61642
14	27	0	o	-5	x	LE	LE	LE	LE	-0.180051	-0.969528	-3.8361	-0.595555		-0.4709	-0.595555	o	-0.554006	-1.2431	-3.21021	-0.786002		-0.581706	-0.786002	o	-0.595555	x	-0.786002	x	-2.00808	x	-1.88211	x	0.39	0.38	-1.15999	-0.530984			-3.02715	-0.584542	-0.872265	o	-1.36777	-0.632922			-2.85387	-1.59288
15	27	12	e	9	e	RE	RE	RE	RE	5.67071	8.60119	5.2887	10.2081	5.1151	9.53678	7.13595	e	5.96255	8.39543	5.85137	9.63462	6.00077	8.46168	7.1981	e	9.53678	e	8.46168	e	5.2887	e	5.96255	e	0.15	0.15	2.68408	7.07316	5.21512	7.92538	6.37615	5.64987	6.01301	e	3.35295	6.78023	5.82647	7.78447	7.04395	5.5804
16	23	-2	x	1	e	RE	RE	RE	RE		0.502062	1.58249	0.810248			0.810248	o		0.560929	1.62059	0.80332			0.80332	o	0.656155	e	0.682124	e	1.58249	e	1.62059	e	0.31	0.32		-0.363564	1.16345		1.18423		1.16345	e		-0.498605	1.29505		1.12882
17	37	0	o	-4	x	RE	RE	RE	RE	-3.33909	-1.03879	-3.15191	-1.29158	-2.56627	-0.0173083	-1.92893	x	-3.22124	-1.54093	-2.8816	-0.952214	-2.61478	-0.249299	-2.07786	x	-1.03879	x	-0.952214	x	-3.15191	x	-2.8816	x	0.2	0.2	-2.43115	-1.77991	-1.91153	-1.15999	-2.30643	-0.0311633	-1.84572	x	-2.44501	-2.1644	-1.99466	-0.948754	-2.19558	-0.200827
18	29	-6	x	-6	x	LE	RE	RE	RE	-5.0908	-5.89653	-3.9105	-2.7932	-4.99708	-1.3366	-4.45379	x	-4.60838	-5.0179	-3.94583	-4.14434	-4.60491	-2.61478	-4.37462	x	-2.7932	x	-4.14434	x	-4.99708	x	-4.60491	x	0.33	0.26		-2.84694	-3.49662	-2.39998	-8.5698	-2.31683	-2.84694	x		-3.59562	-3.37183	-3.06527	-8.80702	-2.63557
19	32	-12	x	-10	x	RE	RE	RE	RE	-11.9369	-9.05401	-10.8522	-8.80354	-9.03746	-11.8447	-9.95312	x	-11.1159	-9.39273	-10.7051	-9.78841	-9.5788	-12.0484	-10.2468	x	-9.05401	x	-9.78841	x	-10.8522	x	-10.7051	x	0.36	0.35	-11.4061	-8.01199	-9.56903	-6.25449	-8.73027	-6.24058	-8.37113	x	-11.9255	-8.47214	-8.24807	-6.32749	-8.32569	-6.54652
20	33	-2	x	-2	x	LE	LE	LE	LE	-2.70141	-1.06972	-0.592091	-0.99377	-2.81584		-1.06972	x	-2.16094	-1.38477	-0.567855	-1.10805	-2.00585		-1.38477	x	-1.03174	x	-1.24641	x	-2.70141	x	-2.00585	x	0.3	0.21	-3.28028	-0.879498	-2.5247	-1.06649	-1.44743		-1.44743	x	-2.3449	-1.49591	-2.03969	-1.10112	-1.20155
21	25	-4	x	-2	x	LE	LE	LE	LE	-2.53855	-0.62672	-1.41626	-2.89892	-2.25447	-0.363566	-1.83536	x	-2.92318	-0.817167	-1.77298	-2.42076	-1.95656	-1.49937	-1.86477	x	-0.62672	x	-1.49937	x	-2.25447	x	-1.95656	x	0.18	0.25	-1.02493	-1.21193	-0.176589	-1.48552	-3.11379	-2.75685	-1.34873	x	-2.64943	-1.59288	-1.58249	-2.08472	-2.74992	-3.2663
22	24	0	o	1	e	RE	LE	LE	LE	-2.40777	3.68924	-2.73606	2.58707		0.609911	0.609911	o	-1.4379	2.84348	-1.5444	1.57211		0.88	0.88	o	2.58707	e	1.57211	e	-2.57191	x	-1.49115	x	0.34	0.39		2.47273		2.25794	-1.49591	-1.57557	0.381013	o		2.54895		1.66215	-1.35046	-0.972994
23	26	0	o	1	e	LE	LE	LE	LE	-1.92885	-0.830904	-0.507204	0.460517	-1.26154		-0.830904	o	-1.51669	-0.438587	-1.47334	0.242375	-1.32041		-1.32041	x	-0.185194	x	-0.0981056	x	-1.26154	x	-1.47334	x	0.25	0.2	-0.0484758				-2.98556	-1.45188	-1.45188	x	-0.657884				-3.20044	-2.08777
24	26	-4	x	-4	x	LE	LE	LE	LE	-3.60778	-1.73887	-2.45764	-0.999175	-4.51817	-3.15709	-2.80736	x	-3.04287	-2.15761	-2.48312	-2.04662	-3.87994	-3.47775	-2.76299	x	-1.73887	x	-2.15761	x	-3.60778	x	-3.04287	x	0.2	0.14	-3.60799	-1.70025	-3.31136	-0.758301	-4.1299	-1.32275	-2.50581	x	-3.12962	-2.2025	-2.61825	-1.91846	-3.82446	-2.348
25	38	-4	x	-4	x	RE	RE	RE	RE	-2.78457		-0.831019		-1.6864		-1.6864	x	-2.81922		-0.855259		-1.5063		-1.5063	x					-1.6864	x	-1.5063	x	0.15	0.18	-2.68062	-0.567857	-4.27533	-0.578242	-2.55588	-1.4128	-1.98434	x	-2.61132	-1.05956	-3.98745	-1.2154	-2.45887	-1.98774
26	28	-6	x	-3	x	RE	RE	RE	RE	-5.26439	-4.35511	-4.73148	-1.18769	-4.35511	-2.3584	-4.35511	x	-5.13941	-4.50776	-4.53899	-1.46128	-4.31348	-2.77764	-4.41062	x	-2.3584	x	-2.77764	x	-4.73148	x	-4.53899	x	0.11	0.15	-5.24009	-3.35295	-5.36509	-3.85221	-4.90336	-3.31829	-4.37778	x	-5.33731	-3.37722	-5.44149	-4.51123	-5.12552	-3.53322
27	31	-4	x	-4	x	RE	RE	RE	RE	-4.49388	-3.37028	-3.0722	-3.16578	-1.04225	-0.238912	-3.11899	x	-4.65696	-4.00132	-3.20044	-3.12419	-1.25003	-0.768688	-3.16232	x	-3.16578	x	-3.12419	x	-3.0722	x	-3.20044	x	0.12	0.19	-3.90075	-4.43837	-5.00402	-4.48		-5.58736	-4.48	x	-4.53899	-5.13594	-5.76798	-4.37593		-6.26839
28	32	2	e	0	o	LE	RE	LE	LE	-0.653773	-0.799851	-0.1215	-0.927364	-1.17384	-1.55133	-0.863608	o	-0.942438	-0.966066	-0.139587	-0.88311	-1.04918	-1.19809	-0.954252	o	-0.927364	x	-0.966066	x	-0.653773	x	-0.942438	x	0.26	0.21	-0.474369	-0.97992	-1.18769	-0.415889	-1.10805	-1.34699	-1.04398	x	-0.865646	-1.11151	-1.03186	-0.792603	-0.990311	-1.35046
29	24	0	o	-1	x	RE	RE	RE	RE		-2.07087	-1.11122	-1.53518	-0.637111		-1.3232	x		-2.44155	-0.877345	-1.97052	-0.900276		-1.4354	x	-1.80302	x	-2.20603	x	-0.874166	x	-0.888811	x	0.28	0.15	-1.87926	-1.4133	-0.841405	-1.21193	-1.99466		-1.4133	x	-1.84792	-1.89075	-0.993768	-1.36431	-1.64137
30	25	4	e	1	e	RE	RE	RE	RE	-1.1491		-1.58942	-0.1385	-2.88853		-1.36926	x	-1.04764		-1.52708	-0.554006	-1.78338		-1.28736	x	-0.1385	x	-0.554006	x	-1.58942	x	-1.52708	x	0.25	0.28	-3.00289	-0.412041	-2.98406	-1.67947	-3.17271		-2.98406	x	-2.64943	-0.831021	-2.17133	-1.81801	-2.63211
[truncated: 12 more columns]
